# Supplementary material for: Seasonal variability of intermediate water masses in the Gulf of Cadiz: implications of the Antarctic and Subarctic seesaw model
Source: Copernicus journal article supplement (doi:10.5194/os-2019-8), 2019-03-15
Supplement: Supplementary file 1 [file os-2019-8-supplement.pdf]

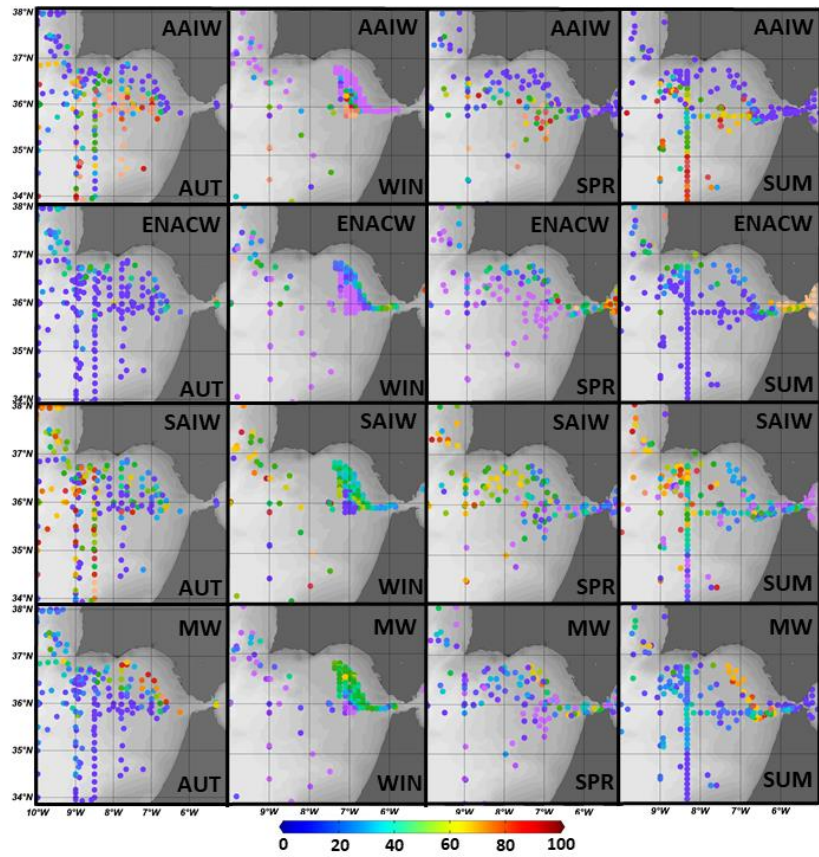

Sup\_1. Predominant intermediate water mass between 400-1000 m in every profile. From left to right: autumn, winter, spring and summer. From top to bottom: every water mass; AAIW, ENACW, SAIW, MW

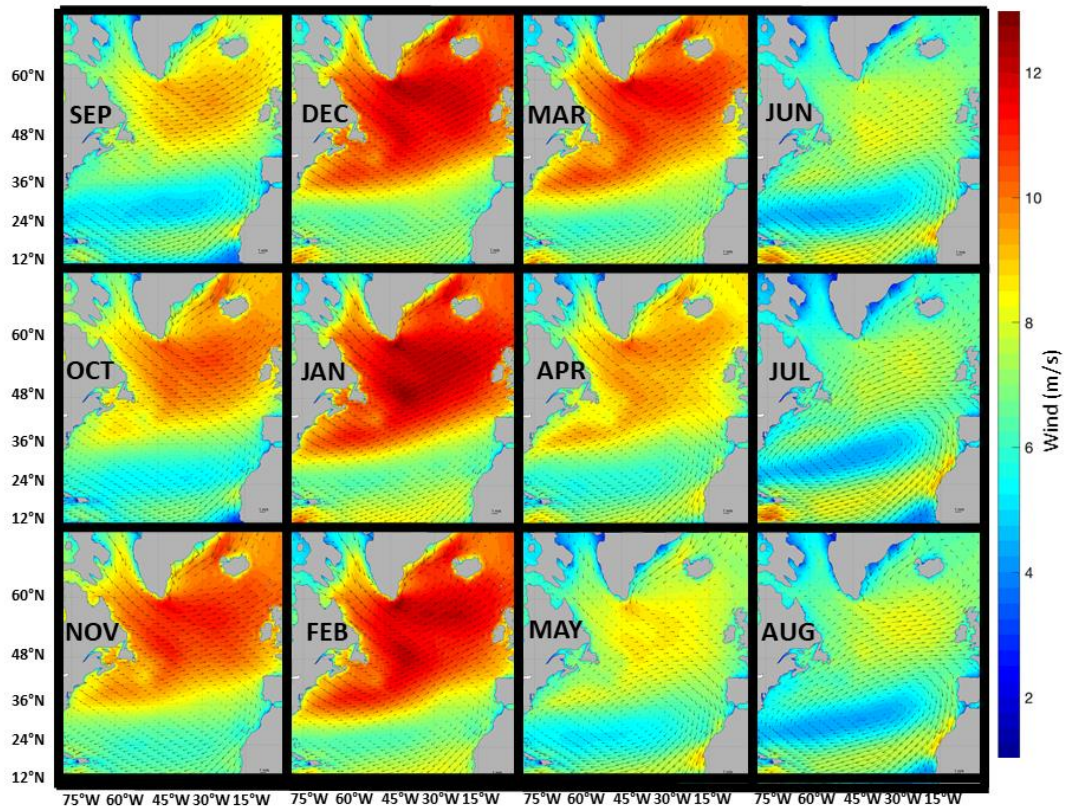

Sup\_2. Monthly Maps of surface winds in the North Atlantic Ocean.

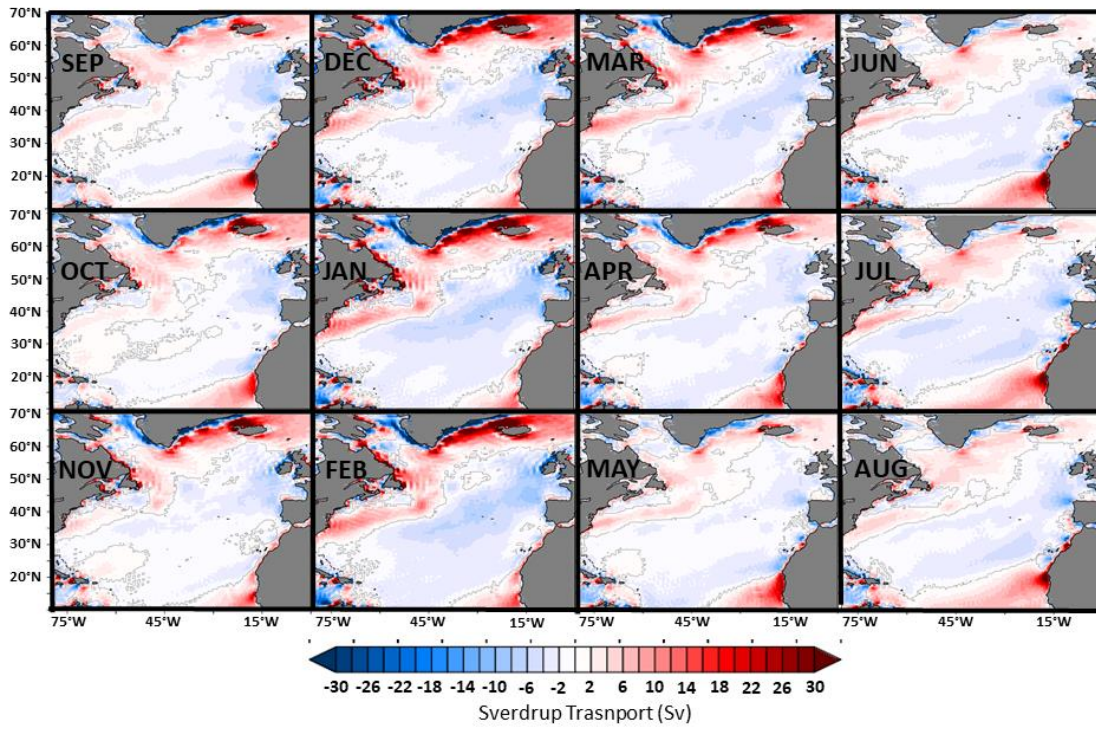

Sup\_3. Monthly Maps of Sverdrup transport in the North Atlantic Ocean.

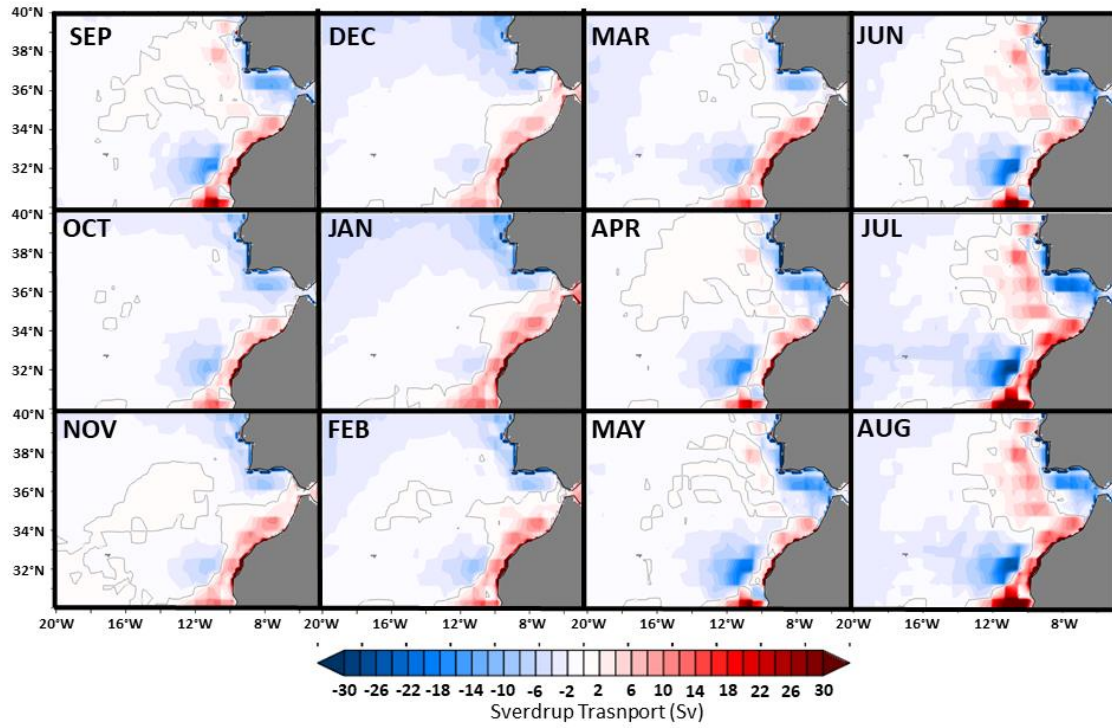

**Sup\_4. Monthly Maps of Sverdrup transport in the Gulf of Cádiz.**

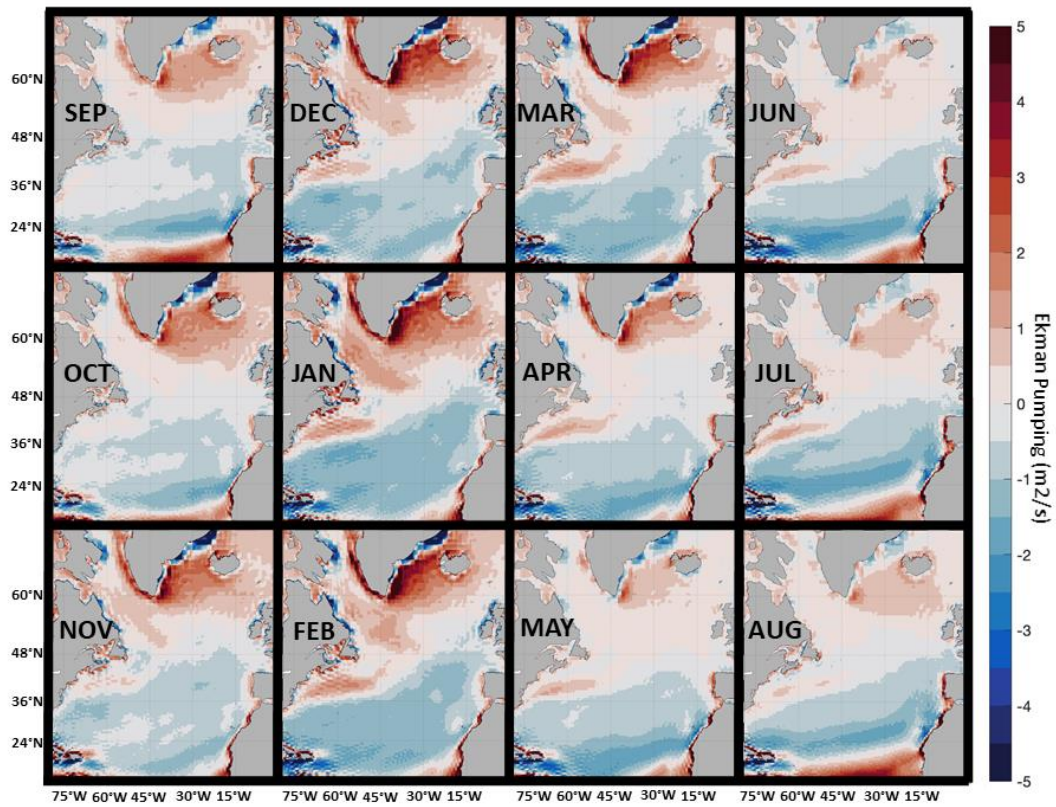

Sup\_5. Monthly Maps of Ekman Pumping in the North Atlantic Ocean.

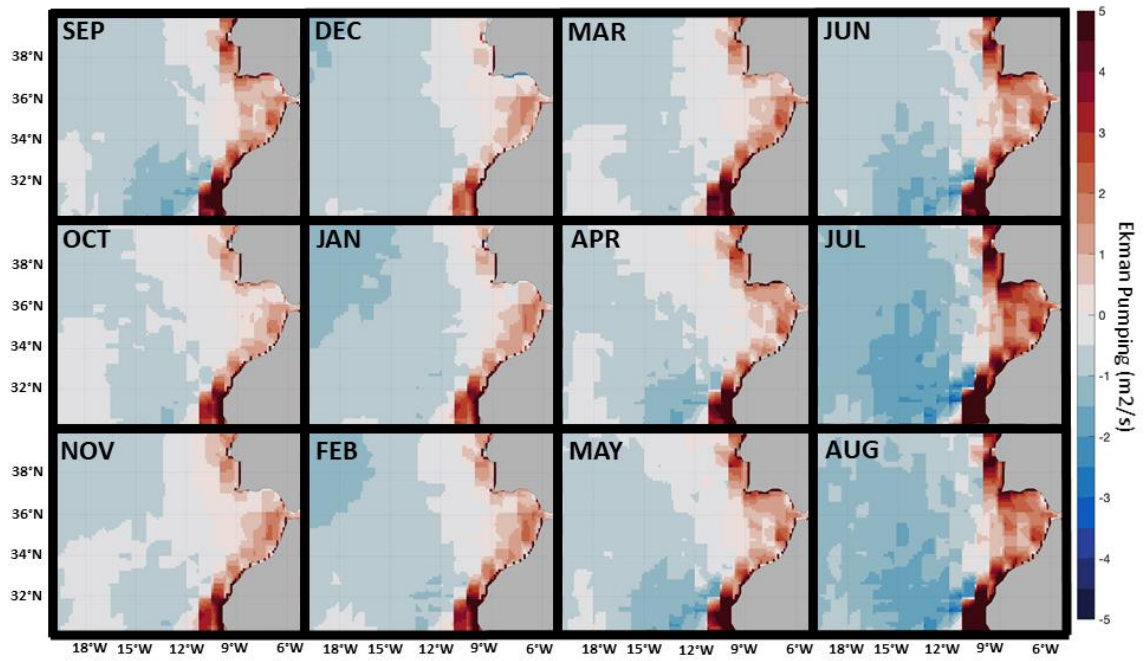

Sup\_6. Monthly Maps of Ekman Pumping in the Gulf of Cádiz.
